# Supplementary material for: Redesigning TOR Kinase to Explore the Structural Basis for TORC1 and TORC2 Assembly
Source: PubMed Central journal article supplement (PMC6023025; doi:10.3390/biom8020036), 2018-06-01
Supplement: biomolecules-08-00036-s001.pdf [file biomolecules-08-00036-s001.pdf]

Supplemental Table S1. Chimera Switch Points

| Plasmid   | Nucleotide Position | Nucleotide sequence                          | Amino Acid Position | Translation        |
|-----------|---------------------|----------------------------------------------|---------------------|--------------------|
| pPL268    |                     |                                              |                     |                    |
| 5' switch |                     |                                              |                     |                    |
| TOR1      | NA                  | NA                                           | NA                  | NA                 |
| TOR2      | 3HA                 | 3HA                                          | 3HA-N               | N-term             |
| Result    |                     |                                              |                     |                    |
| 3'switch  |                     |                                              |                     |                    |
| TOR1      | 2812                | atccaagc <u>gattat</u> gcatat <del>ttt</del> | 938                 | IQAIM <u>M</u> HIF |
| TOR2      | 2836                | attcaagct <u>attat</u> gcatat <del>ttt</del> | 946                 | IQAI <u>M</u> HIF  |
| Result    |                     | attcaagctattatgcatat <del>ttt</del>          |                     | IQAIMHIF           |
| pPL172    |                     |                                              |                     |                    |
| 5' switch |                     |                                              |                     |                    |
| TOR1      | 301                 | gatctactag <u>ttat</u> ccttgaattg            | 101                 | DLLV <u>S</u> LEL  |
| TOR2      | 340                 | actactttgac <u>ctc</u> attagcaagg            | 114                 | TTLT <u>S</u> LAR  |
| Result    |                     | gatctactagtctcattagcaagg                     |                     | DLLVSLAR           |
| 3'switch  |                     |                                              |                     |                    |
| TOR1      | 5290                | tttgaagtaat <u>atc</u> atggttcag             | 1764                | FEVIS <u>M</u> VQ  |
| TOR2      | 5308                | tttgaagtc <u>attt</u> ctatgctaaca            | 1770                | FEVI <u>S</u> MLT  |
| Result    |                     | tttgaagtcattccatggttcag                      |                     | FEVISMVQ           |
| pPL271    |                     |                                              |                     |                    |
| 5' switch |                     |                                              |                     |                    |
| TOR1      | 301                 | gatctactag <u>ttat</u> ccttgaattg            | 101                 | DLLV <u>S</u> LEL  |
| TOR2      | 340                 | actactttgac <u>ctc</u> attagcaagg            | 114                 | TTLT <u>S</u> LAR  |
| Result    |                     | gatctactagtctcattagcaagg                     |                     | DLLVSLAR           |
| 3'switch  |                     |                                              |                     |                    |
| TOR1      | 2812                | atccaagc <u>gattat</u> gcatat <del>ttt</del> | 938                 | IQAIM <u>M</u> HIF |
| TOR2      | 2836                | attcaagct <u>attat</u> gcatat <del>ttt</del> | 946                 | IQAI <u>M</u> HIF  |
| Result    |                     | attcaagctattatgcatat <del>ttt</del>          |                     | IQAIMHIF           |
| pPL273    |                     |                                              |                     |                    |

|           |      |                          |     |                   |
|-----------|------|--------------------------|-----|-------------------|
| 5' switch |      |                          |     |                   |
| TOR1      | 1252 | attgcatatgaagtcgggcccgat | 418 | IAYE <u>V</u> GPD |
| TOR2      | 1282 | gatattgcatttgaagttggttcg | 428 | IAFE <u>V</u> GSS |
| Result    |      | attgcatatgaagttggttcgagc |     | IAYE <u>V</u> GSS |
|           |      |                          |     |                   |
| 3'switch  |      |                          |     |                   |
| TOR1      | 2812 | atccaagcgattatgcatatttt  | 938 | IQAI <u>M</u> HIF |
| TOR2      | 2836 | attcaagctattatgcatatttt  | 946 | IQAI <u>M</u> HIF |
| Result    |      | attcaagctattatgcatatttt  |     | IQAI <u>M</u> HIF |
|           |      |                          |     |                   |
| pPL175    |      |                          |     |                   |
|           |      |                          |     |                   |
| 5' switch |      |                          |     |                   |
| TOR1      | 1738 | agcagatttcggttggaattc    | 580 | SRF <u>S</u> LVEF |
| TOR2      | 1768 | catcaatattccttgacggagttt | 590 | HQY <u>S</u> LTEF |
| Result    |      | agcagatttcggttgacggagttt |     | SRF <u>S</u> LTEF |
|           |      |                          |     |                   |
| 3'switch  |      |                          |     |                   |
| TOR1      | 2812 | atccaagcgattatgcatatttt  | 938 | IQAI <u>M</u> HIF |
| TOR2      | 2836 | attcaagctattatgcatatttt  | 946 | IQAI <u>M</u> HIF |
| Result    |      | attcaagctattatgcatatttt  |     | IQAI <u>M</u> HIF |
|           |      |                          |     |                   |
| pPL176    |      |                          |     |                   |
|           |      |                          |     |                   |
| 5' switch |      |                          |     |                   |
| TOR1      | 2014 | aatttgagactctgtttactgca  | 672 | NLRL <u>L</u> FTA |
| TOR2      | 2044 | aatttacgctacttttcatggcg  | 682 | NLRL <u>L</u> FMA |
| Result    |      | aatttgagactccttttcatggcg |     | NLRL <u>L</u> FMA |
|           |      |                          |     |                   |
| 3'switch  |      |                          |     |                   |
| TOR1      | 2812 | atccaagcgattatgcatatttt  | 938 | IQAI <u>M</u> HIF |
| TOR2      | 2836 | attcaagctattatgcatatttt  | 946 | IQAI <u>M</u> HIF |
| Result    |      | attcaagctattatgcatatttt  |     | IQAI <u>M</u> HIF |
|           |      |                          |     |                   |
| pPL212    |      |                          |     |                   |
|           |      |                          |     |                   |
| 5' switch |      |                          |     |                   |
| TOR1      | 2014 | aatttgagactctgtttactgca  | 672 | NLRL <u>L</u> FTA |
| TOR2      | 2044 | aatttacgctacttttcatggcg  | 682 | NLRL <u>L</u> FMA |
| Result    |      | aatttgagactccttttcatggcg |     | NLRL <u>L</u> FMA |
|           |      |                          |     |                   |

|           |      |                                     |      |                   |
|-----------|------|-------------------------------------|------|-------------------|
| 3'switch  |      |                                     |      |                   |
| TOR1      | 3688 | caacaaagaact <u>aa</u> agaagattgg   | 1230 | QQR <u>T</u> KEDW |
| TOR2      | 3706 | caacagaagac <u>ca</u> aaagaagattgg  | 1236 | QQK <u>T</u> KEDW |
| Result    |      | caacagaagac <u>ca</u> aaagaagattgg  |      | QQK <u>T</u> KEDW |
|           |      |                                     |      |                   |
| pPL180    |      |                                     |      |                   |
|           |      |                                     |      |                   |
| 5' switch |      |                                     |      |                   |
| TOR1      | 3025 | gttgctaagct <u>a</u> caataacgctt    | 1009 | VAK <u>L</u> QITL |
| TOR2      | 3055 | atcattaaact <u>a</u> caatcacaatt    | 1019 | I <u>I</u> KLQITI |
| Result    |      | gttgctaagct <u>a</u> caatcacaatt    |      | VAK <u>L</u> QITI |
|           |      |                                     |      |                   |
| 3'switch  |      |                                     |      |                   |
| TOR1      | 5290 | tttgaagtaata <u>t</u> ccatggttcag   | 1764 | FEV <u>I</u> SMVQ |
| TOR2      | 5308 | tttgaagtcatt <u>t</u> ctatgctaaca   | 1770 | FEV <u>I</u> SMLT |
| Result    |      | tttgaagtcatt <u>t</u> ccatggttcag   |      | FEV <u>I</u> SMVQ |
|           |      |                                     |      |                   |
| pPL184    |      |                                     |      |                   |
|           |      |                                     |      |                   |
| 5' switch |      |                                     |      |                   |
| TOR1      | 3025 | gttgctaagct <u>a</u> caataacgctt    | 1009 | VAK <u>L</u> QITL |
| TOR2      | 3055 | atcattaaact <u>a</u> caatcacaatt    | 1019 | I <u>I</u> KLQITI |
| Result    |      | gttgctaagct <u>a</u> caatcacaatt    |      | VAK <u>L</u> QITI |
|           |      |                                     |      |                   |
| 3'switch  |      |                                     |      |                   |
| TOR1      | 4606 | aatagagcatat <u>a</u> gcgttattgtt   | 1536 | NRAY <u>S</u> VIV |
| TOR2      | 4624 | aatagagcat <u>a</u> tataatgttattgtt | 1542 | NRAY <u>N</u> VVV |
| Result    |      | aatagagcatat <u>a</u> gcgttattgtt   |      | NRAY <u>S</u> VIV |
|           |      |                                     |      |                   |
| pPL185    |      |                                     |      |                   |
|           |      |                                     |      |                   |
| 5' switch |      |                                     |      |                   |
| TOR1      | 3685 | caacaaagaact <u>aa</u> agaagattgg   | 1229 | QQR <u>T</u> KEDW |
| TOR2      | 3709 | caacagaagac <u>ca</u> aaagaagattgg  | 1237 | QQK <u>T</u> KEDW |
| Result    |      | caacaaagaact <u>aa</u> agaagattgg   |      | QQR <u>T</u> KEDW |
|           |      |                                     |      |                   |
| 3'switch  |      |                                     |      |                   |
| TOR1      | 5290 | tttgaagtaata <u>t</u> ccatggttcag   | 1764 | FEV <u>I</u> SMVQ |
| TOR2      | 5308 | tttgaagtcatt <u>t</u> ctatgctaaca   | 1770 | FEV <u>I</u> SMLT |
| Result    |      | tttgaagtcatt <u>t</u> ccatggttcag   |      | FEV <u>I</u> SMVQ |
|           |      |                                     |      |                   |

|           |      |                                                                                            |       |                                    |
|-----------|------|--------------------------------------------------------------------------------------------|-------|------------------------------------|
| pPL209    |      |                                                                                            |       |                                    |
| 5' switch |      |                                                                                            |       |                                    |
| TOR1      | 4174 | cattcacttcaattaaaggagaca                                                                   | 1392  | HSLQLKET                           |
| TOR2      | 4198 | aatgaattgcagctgaaggaaact                                                                   | 1400  | NELQLKET                           |
| Result    |      | cattcacttcaactgaaggaaact                                                                   |       | HSLQLKET                           |
| 3'switch  |      |                                                                                            |       |                                    |
| TOR1      | 5290 | tttgaagtaatatccatgggtcag                                                                   | 1764  | FEVISMVQ                           |
| TOR2      | 5308 | tttgaagtcatttctatgctaaca                                                                   | 1770  | FEVISM <del>L</del> T              |
| Result    |      | tttgaagtcatttccatgggtcag                                                                   |       | FEVISMVQ                           |
| pPL214    |      | Switch points are the same as for 273 and 184 together.                                    |       |                                    |
| pPL321    |      | Entirely <i>TOR2</i> sequence (with endogenous Promoter and Terminator) in pPL130 backbone |       |                                    |
| pPL333    |      |                                                                                            |       |                                    |
| 5' switch |      |                                                                                            |       |                                    |
| TOR1      | 1246 | attggtgatattgcatatgaagtc                                                                   | 416   | IGDIA <del>Y</del> EV              |
| TOR2      | 1270 | ataggtgatattgcat <del>t</del> gaagtt                                                       | 424   | IGDIA <del>F</del> EV              |
| Result    |      | ataggtgatattgcatatgaagtc                                                                   |       | IGDIA <del>Y</del> EV              |
| 3'switch  |      |                                                                                            |       |                                    |
| TOR1      | 2815 | gcgattatgcatat <del>t</del> tttcaaacc                                                      | 939   | AIMHIF <del>Q</del> T              |
| TOR2      | 2845 | gctattatgcatat <del>t</del> tttcaaacc                                                      | 949   | AIMHIF <del>Q</del> N              |
| Result    |      | gcgattatgcatat <del>t</del> tttcaaacc                                                      |       | AIMHIF <del>Q</del> N              |
| pPL270    |      |                                                                                            |       |                                    |
| 5' switch |      |                                                                                            |       |                                    |
| TOR1      | NA   | NA                                                                                         | NA    | NA                                 |
| TOR2      | 3HA  | 3HA                                                                                        | 3HA-N | N-term                             |
| Result    |      |                                                                                            |       |                                    |
| 3'switch  |      |                                                                                            |       |                                    |
| TOR1      | 1246 | attgcatatgaagtcgggcccgat                                                                   | 416   | I <del>A</del> YEVGPD              |
| TOR2      | 1270 | attgcat <del>t</del> gaagttggttcgagc                                                       | 424   | I <del>A</del> F <del>E</del> VGSS |
| Result    |      | attgcatatgaagttggttcgagc                                                                   |       | I <del>A</del> YEVGSS              |
| pPL173    |      |                                                                                            |       |                                    |

|           |      |                          |       |                           |
|-----------|------|--------------------------|-------|---------------------------|
|           |      |                          |       |                           |
| 5' switch |      |                          |       |                           |
| TOR1      | 1252 | attgcatatgaagtcgggcccgat | 418   | IAYE <u>V</u> GP <u>D</u> |
| TOR2      | 1282 | gatattgcatttgaagttggttcg | 428   | IAFE <u>V</u> GSS         |
| Result    |      | attgcatatgaagttggttcgagc |       | IAYE <u>V</u> GSS         |
|           |      |                          |       |                           |
| 3'switch  |      |                          |       |                           |
| TOR1      | 2017 | aatttgagactctgtttactgca  | 673   | NLRLL <u>F</u> TA         |
| TOR2      | 2041 | aatttacgcctactttcatggcg  | N-681 | NLRLL <u>F</u> MA         |
| Result    |      | aatttacgcctattgtttactgca |       | NLRLL <u>F</u> TA         |
|           |      |                          |       |                           |
| pPL177    |      |                          |       |                           |
|           |      |                          |       |                           |
| 5' switch |      |                          |       |                           |
| TOR1      | 2329 | actataggtgagctatctgttgta | 777   | TIGEL <u>S</u> VV         |
| TOR2      | 2359 | gttttgggtgaactatctgttggt | 787   | VLGEL <u>S</u> VV         |
| Result    |      | actataggtgagctatctgttggt |       | TIGEL <u>S</u> VV         |
|           |      |                          |       |                           |
| 3'switch  |      |                          |       |                           |
| TOR1      | 2812 | atccaagcgattatgcatatttt  | 938   | IQAIM <u>H</u> IF         |
| TOR2      | 2836 | attcaagctattatgcatatttt  | 946   | IQAIM <u>H</u> IF         |
| Result    |      | attcaagctattatgcatatttt  |       | IQAIM <u>H</u> IF         |
|           |      |                          |       |                           |
| pPL183    |      |                          |       |                           |
|           |      |                          |       |                           |
| 5' switch |      |                          |       |                           |
| TOR1      | 3025 | gttgctaagctacaaataacgctt | 1009  | VAKL <u>Q</u> ITL         |
| TOR2      | 3055 | atcattaaactacaaatcacaatt | 1019  | IIKL <u>Q</u> ITI         |
| Result    |      | gttgctaagctacaaatcacaatt |       | VAKL <u>Q</u> ITI         |
|           |      |                          |       |                           |
| 3'switch  |      |                          |       |                           |
| TOR1      | 4177 | cattcaactcaattaaaggagaca | 1393  | HSL <u>Q</u> LKET         |
| TOR2      | 4195 | aatgaattgcagctgaaggaaact | 1399  | NEL <u>Q</u> LKET         |
| Result    |      | aatgaattgcagctgaaggaaact |       | NEL <u>Q</u> LKET         |
|           |      |                          |       |                           |
| pPL182    |      |                          |       |                           |
|           |      |                          |       |                           |
| 5' switch |      |                          |       |                           |
| TOR1      | 3025 | gttgctaagctacaaataacgctt | 1009  | VAKL <u>Q</u> ITL         |
| TOR2      | 3055 | atcattaaactacaaatcacaatt | 1019  | IIKL <u>Q</u> ITI         |
| Result    |      | gttgctaagctacaaatcacaatt |       | VAKL <u>Q</u> ITI         |

|           |      |                          |      |          |
|-----------|------|--------------------------|------|----------|
| 3'switch  |      |                          |      |          |
| TOR1      | 3688 | caacaagaactaaagaagattgg  | 1230 | QQRTKEDW |
| TOR2      | 3706 | caacagaagaccaagaagattgg  | 1236 | QQKTKEDW |
| Result    |      | caacagaagaccaagaagattgg  |      | QQKTKEDW |
| pPL186    |      |                          |      |          |
| 5' switch |      |                          |      |          |
| TOR1      | 4603 | aatagagcatatagcgttattggt | 1535 | NRAYSVIV |
| TOR2      | 4627 | aatagagcatataatggtggtggt | 1543 | NRAYNVVV |
| Result    |      | aatagagcatataatggtggtggt |      | NRAYNVVV |
| 3'switch  |      |                          |      |          |
| TOR1      | 5290 | tttgaagtaatatcatggttcag  | 1764 | FEVISMVQ |
| TOR2      | 5308 | tttgaagtcatttctatgctaaca | 1770 | FEVISMLT |
| Result    |      | tttgaagtcatttccatggttcag |      | FEVISMVQ |
